# Supplementary material for: Incorporation of inline warm-rain diagnostics into the COSP2 satellite simulator for process-oriented model evaluation
Source: Copernicus journal article supplement (doi:10.5194/gmd-2019-104), 2019-06-27
Supplement: Supplementary file [file gmd-2019-104-AC4-supplement.pdf]

## Response to Short Comment of gmd-2019-104

Dear Dr. David Ham,

Thank you very much for posting the comment on the discussion forum. I am returning herewith a manuscript revised according to the comment.

**[SC]: Short comment**

**[AC]: Author comment**

**David Ham (Executive editor):**

**[SC]** *This comment is written to raise respects in which this manuscript is not compliant with GMD policy. The issues raised here need to be addressed before any revised manuscript can be accepted.*

### **Code and data embargo**

*It is not acceptable to embargo code or data from a GMDD manuscript. This undermines the open peer review process. The Zenodo archive of the data and scripts needs to be immediately published (for example by citing it in a response to this comment) in order to enable readers of the GMDD manuscript to properly review the work.*

### **Code on GitHub**

*The reference to the COSP2 code is a GitHub link. While GitHub is an excellent development platform, it is not a suitable archive location. Indeed, GitHub themselves tell you to use Zenodo for this purpose and provide integration to make this easy<sup>1</sup>. Please produce a suitable archive of the code (e.g. on Zenodo) and cite this.*

*For further details, including the absolute prohibition on embargoes, please see the GMD model code and data policy<sup>2</sup>*

<sup>1</sup><https://guides.github.com/activities/citable-code/>

<sup>2</sup>[https://www.geoscientific-model-development.net/about/code\\_and\\_data\\_policy.html](https://www.geoscientific-model-development.net/about/code_and_data_policy.html)

**[AC]** We would like to thank Dr. David Ham for his notification of data policy in GMD. The source code of COSP2 for the online diagnostics<sup>1</sup> and data<sup>2</sup> used in this study are included in the Zenodo repository, and are now open to public. We have modified the ‘Code and data availability’ section in the revised manuscript.

<sup>1</sup><https://doi.org/10.5281/zenodo.1442468>

<sup>2</sup><https://doi.org/10.5281/zenodo.3370823>

Thank you very much for handling our paper.

Sincerely yours,

Takuro Michibata
